# Supplementary material for: Uniaxial Mechanical Strain Modulates the Differentiation of Neural Crest Stem Cells into Smooth Muscle Lineage on Micropatterned Surfaces
Source: PubMed Central journal article supplement (PMC3189240; doi:10.1371/journal.pone.0026029), 2011-10-07
Supplement: pone.0026029.s001.pdf [file pone.0026029.s001.pdf]

**Table 1.** Primers for qPCR

| Gene name | Forward primer (5' to 3')  | Reverse primer (5' to 3')  |
|-----------|----------------------------|----------------------------|
| CNN1      | GCATGTCCTCTGCTCACTTCAA     | GGGCCAGCTTGTTCTTAACCT      |
| cbfa1     | CCAGAAGGCACAGACAGAAGCT     | AGGAATGCGCCCTAAATCACT      |
| c-Myc     | GGACCCGCTTCTCTGAAAGG       | GAGGCTGCTGGTTTTCCACTA      |
| Col-II    | GGAAGAGTGGAGACTACTGGATTGAC | TCCATGTTGCAGAAAACCTTCA     |
| Klf4      | TCCTTCCTGCCCGATCAG         | GGCATGAGCTCTTGTAATGG       |
| MHC       | GCCTCCGTGCTACACAACCT       | GCAGAAGAGGCCAGAGTACGTATATA |
| Nanog     | TGCCTCACACGGAGACTGTC       | TGCTATTCTTCGGCCAGTTG       |
| Oct3/4    | GAGAACAATGAGAACCTTCAGGAGA  | TTCTGGCGCCGGTTACAGAACCA    |
| PPARG     | TTGAATGTCGTGTCTGTGGAGAT    | GGAAGAAACCCTTGCATCCTT      |
| SMA       | CAGCTCCAGCTATGTGTGAAGAA    | GCAAAGCCGGCCTTACAGA        |
| SMTN      | CAGCTGGAGTCCATGAACGA       | GCTTCGCAACAGTGCAGTCA       |
| Sox2      | CACTGCCCTCTCACACATG        | CCCATTTCCCTCGTTTTTCTT      |
| TUJ1      | GGGCCAAGTTCTGGGAAGTC       | CGAGTCGCCACGTAGTTG         |
| 18S rRNA  | CGCAGCTAGGAATAATGGAATAGG   | CATGGCCTCAGTTCCGAAA        |
